# Supplementary material
Source: PubMed Central journal article supplement (PMC2546555)

Supplementary Fig. 1. Effects of Runx2 on Pi-induced chondrocytes apoptosis. *A*, Alizarin red staining of the ATDC5 cells cultured in the presence of ITS for 14 days and then with ITS + 20 mM Pi for 24 hours. Retrovirus vector-mediated overexpression of *runx2* promoted, and dominant negative *runx2* (Runx2<sup>DN</sup>) suppressed Pi-induced mineralization of ATDC5 cells. *B*, Overexpression of *runx2* or dominant negative *runx2* did not affect Pi-induced apoptosis as determined by cleaved caspase-7 immunoblotting.

**A**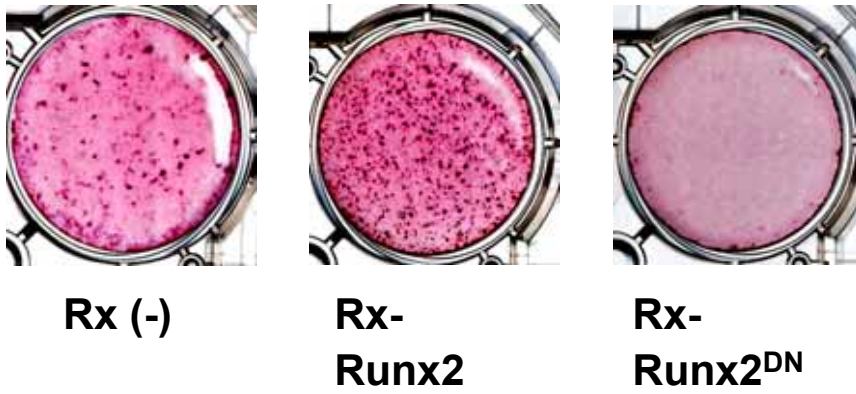**B****IB Cleaved caspase-7**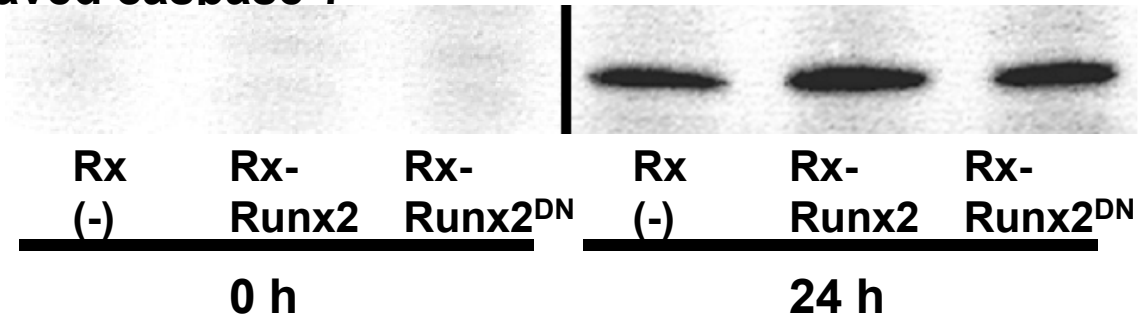

Supplement: M800933200_1.pdf [file M800933200_1.pdf]
